# Supplementary material for: Theoretical study of the structural and electronic properties of the Fen(C6H6)m, n≤ 2; m≤ 2 complexes
Source: Royal Society of Chemistry journal article supplement (doi:10.1039/b922847k), 2010-01-01
Supplement: b922847k.pdf [file b922847k.pdf]

**Figure Captions for the Electronic Supplementary Information Section.**

Figure S1. Contour plots for the HOMO and LUMO orbitals of the GS of Fe-C<sub>6</sub>H<sub>6</sub>.

Figure S2. Contour plots for the HOMO and LUMO orbitals of Fe<sub>6</sub>-(C<sub>6</sub>H<sub>6</sub>)<sub>2</sub>.

Figure S3a. Contour plots for the HOMO and LUMO orbitals of the M = 5 parallel state of Fe<sub>2</sub>-C<sub>6</sub>H<sub>6</sub>.

Figure S3b. Contour plots for the HOMO and LUMO orbitals of the GS of Fe<sub>2</sub>-C<sub>6</sub>H<sub>6</sub>.

Figure S4. Contour plots for the HOMO and LUMO orbitals of the GS of Fe<sub>2</sub>-(C<sub>6</sub>H<sub>6</sub>)<sub>2</sub>

Figure S5. Estimated IR spectra for Fe-C<sub>6</sub>H<sub>6</sub>, [Fe-C<sub>6</sub>H<sub>6</sub>]<sup>+</sup> and [Fe-C<sub>6</sub>H<sub>6</sub>]<sup>-</sup>.

Figure S6. Calculated IR spectra for Fe-(C<sub>6</sub>H<sub>6</sub>)<sub>2</sub>, [Fe-(C<sub>6</sub>H<sub>6</sub>)<sub>2</sub>]<sup>+</sup> and [Fe-(C<sub>6</sub>H<sub>6</sub>)<sub>2</sub>]<sup>-</sup>.

Figure S7. Estimated IR spectra for Fe<sub>2</sub>-C<sub>6</sub>H<sub>6</sub>, [Fe<sub>2</sub>-C<sub>6</sub>H<sub>6</sub>]<sup>+</sup> and [Fe<sub>2</sub>-C<sub>6</sub>H<sub>6</sub>]<sup>-</sup>.

Figure S8. Calculated IR spectra for Fe<sub>2</sub>-(C<sub>6</sub>H<sub>6</sub>)<sub>2</sub>, [Fe<sub>2</sub>-(C<sub>6</sub>H<sub>6</sub>)<sub>2</sub>]<sup>+</sup> and [Fe<sub>2</sub>-(C<sub>6</sub>H<sub>6</sub>)<sub>2</sub>]<sup>-</sup>.

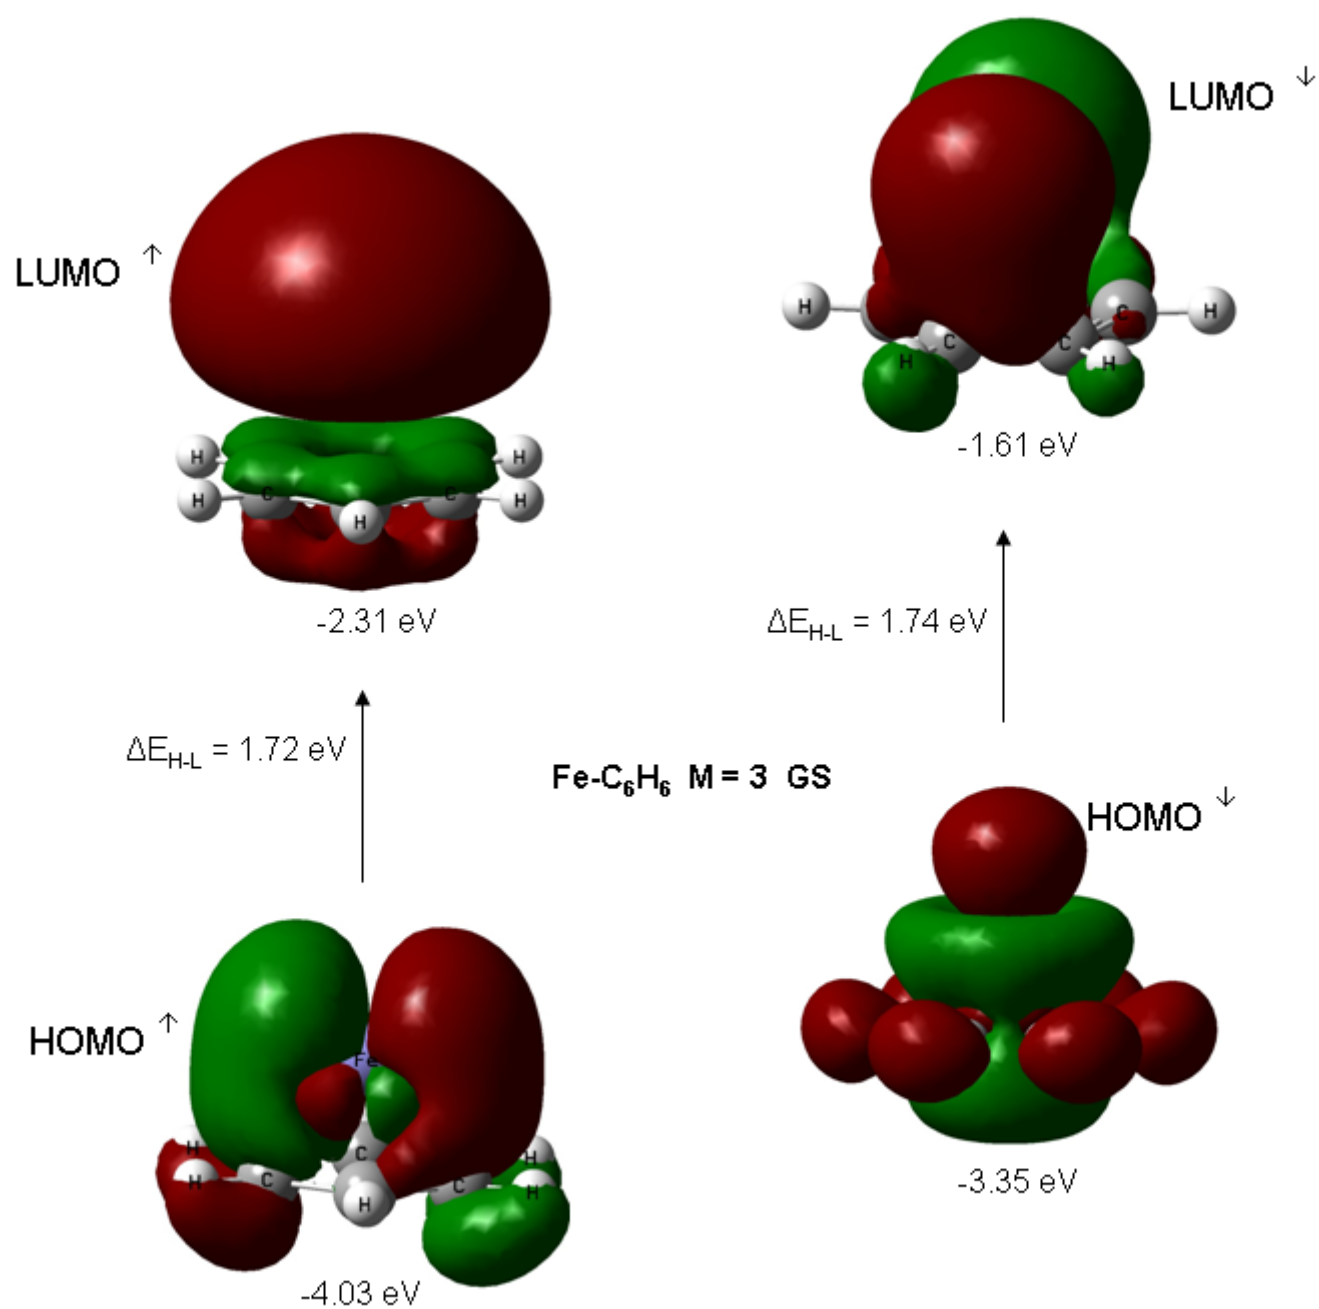

Figure S1

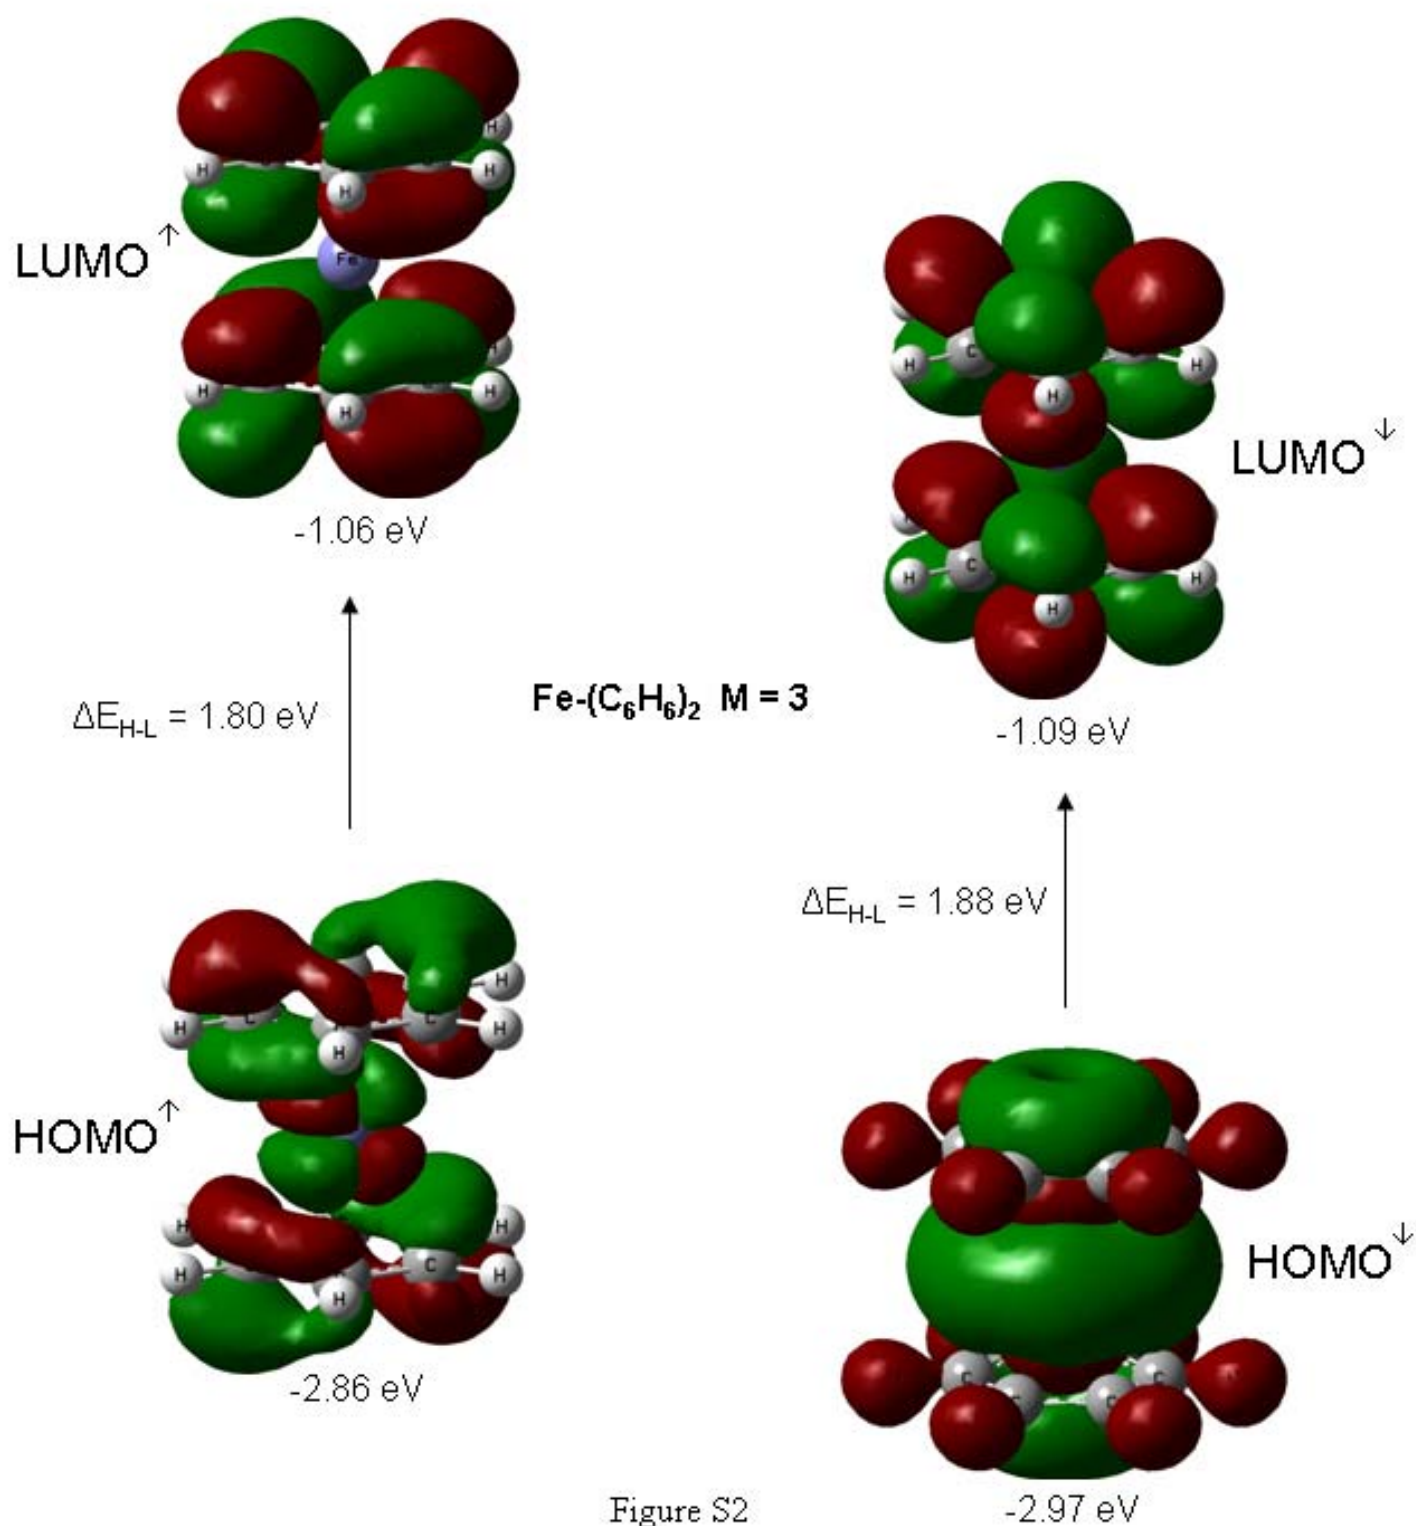

Figure S2

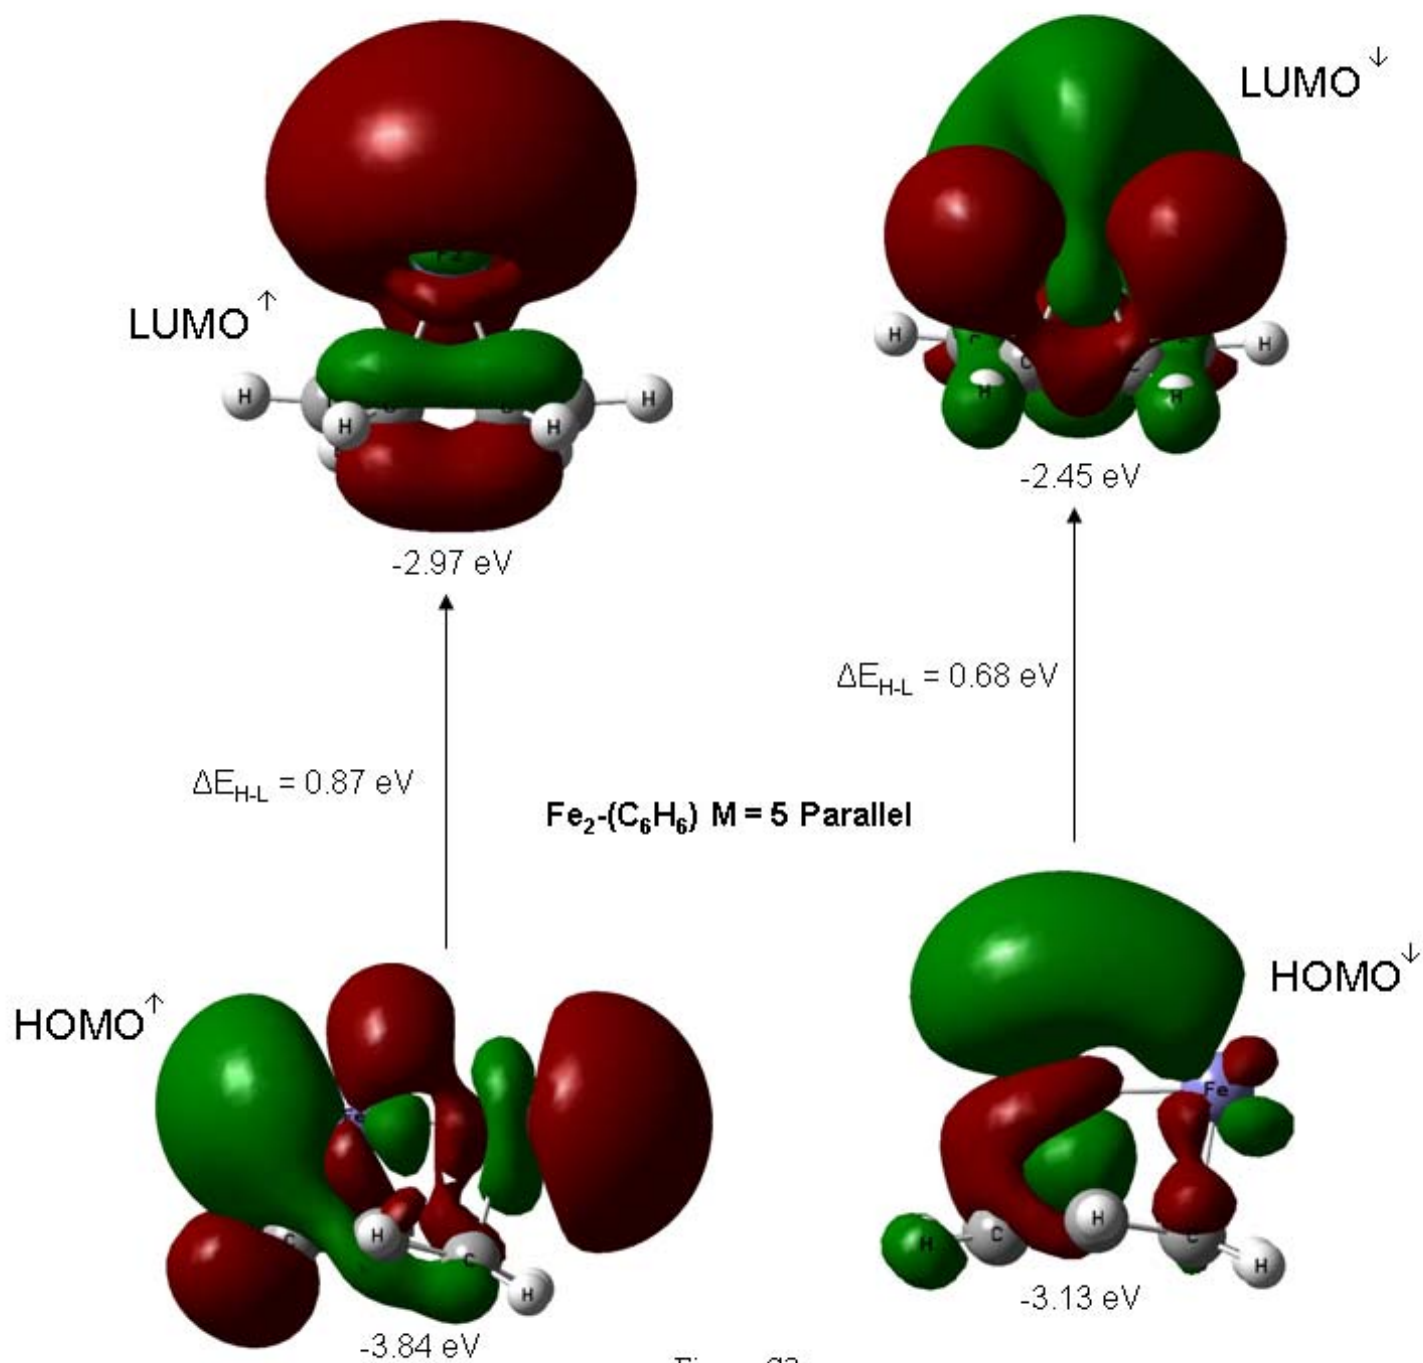

Figure S3a

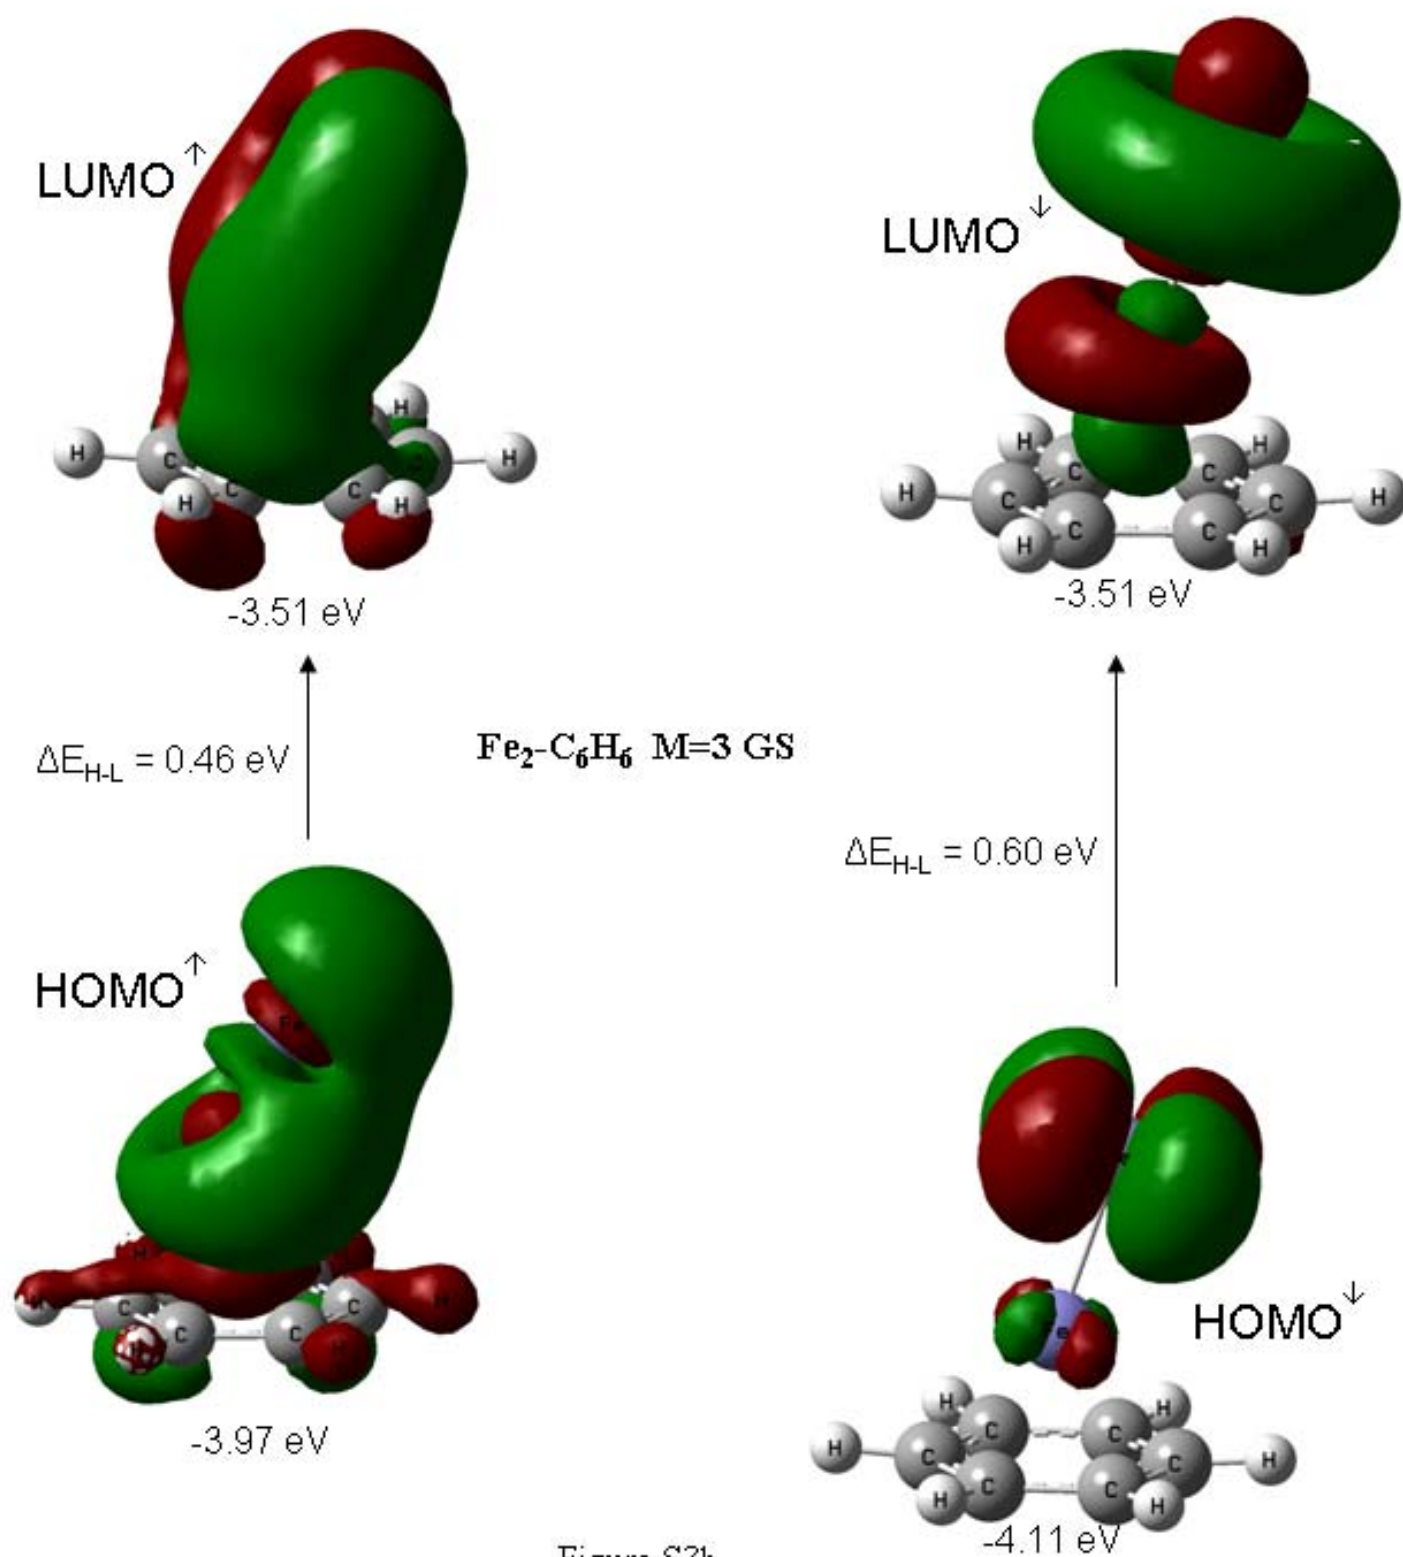

Figure S3b

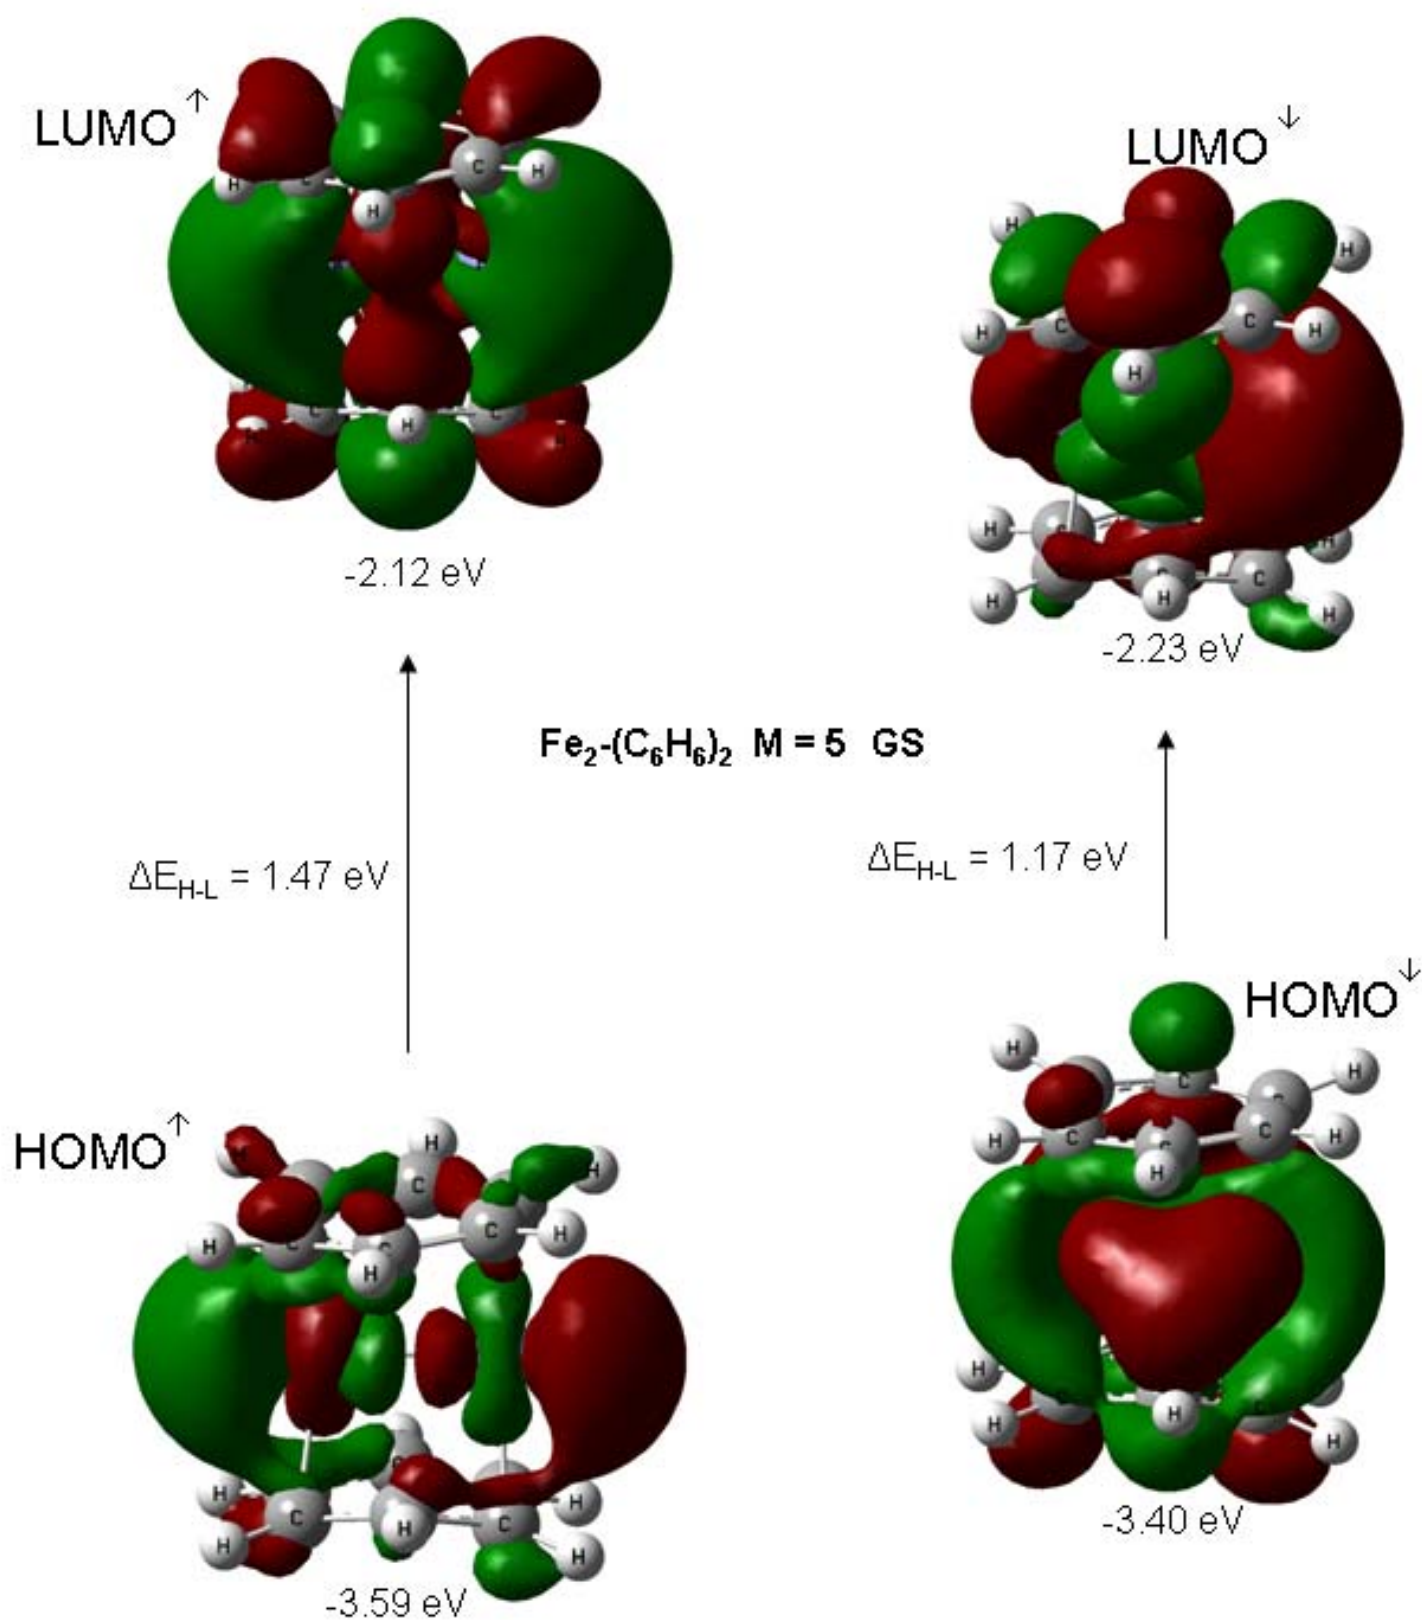

Figure S4



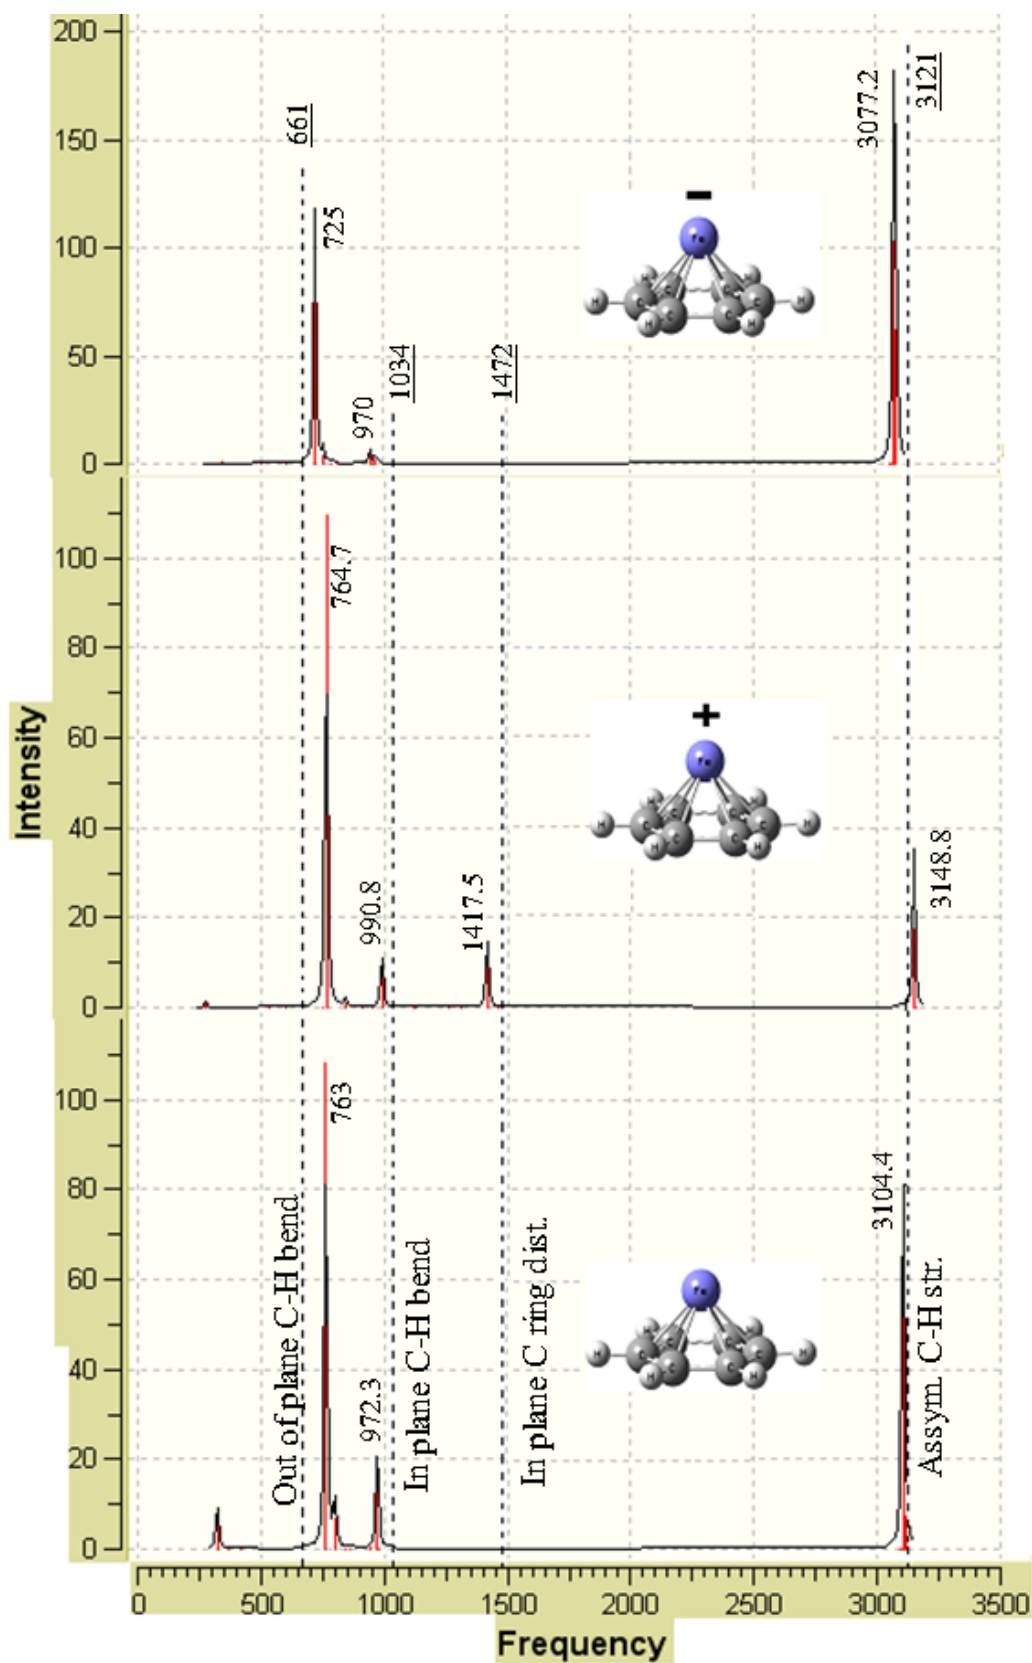

Figure S5

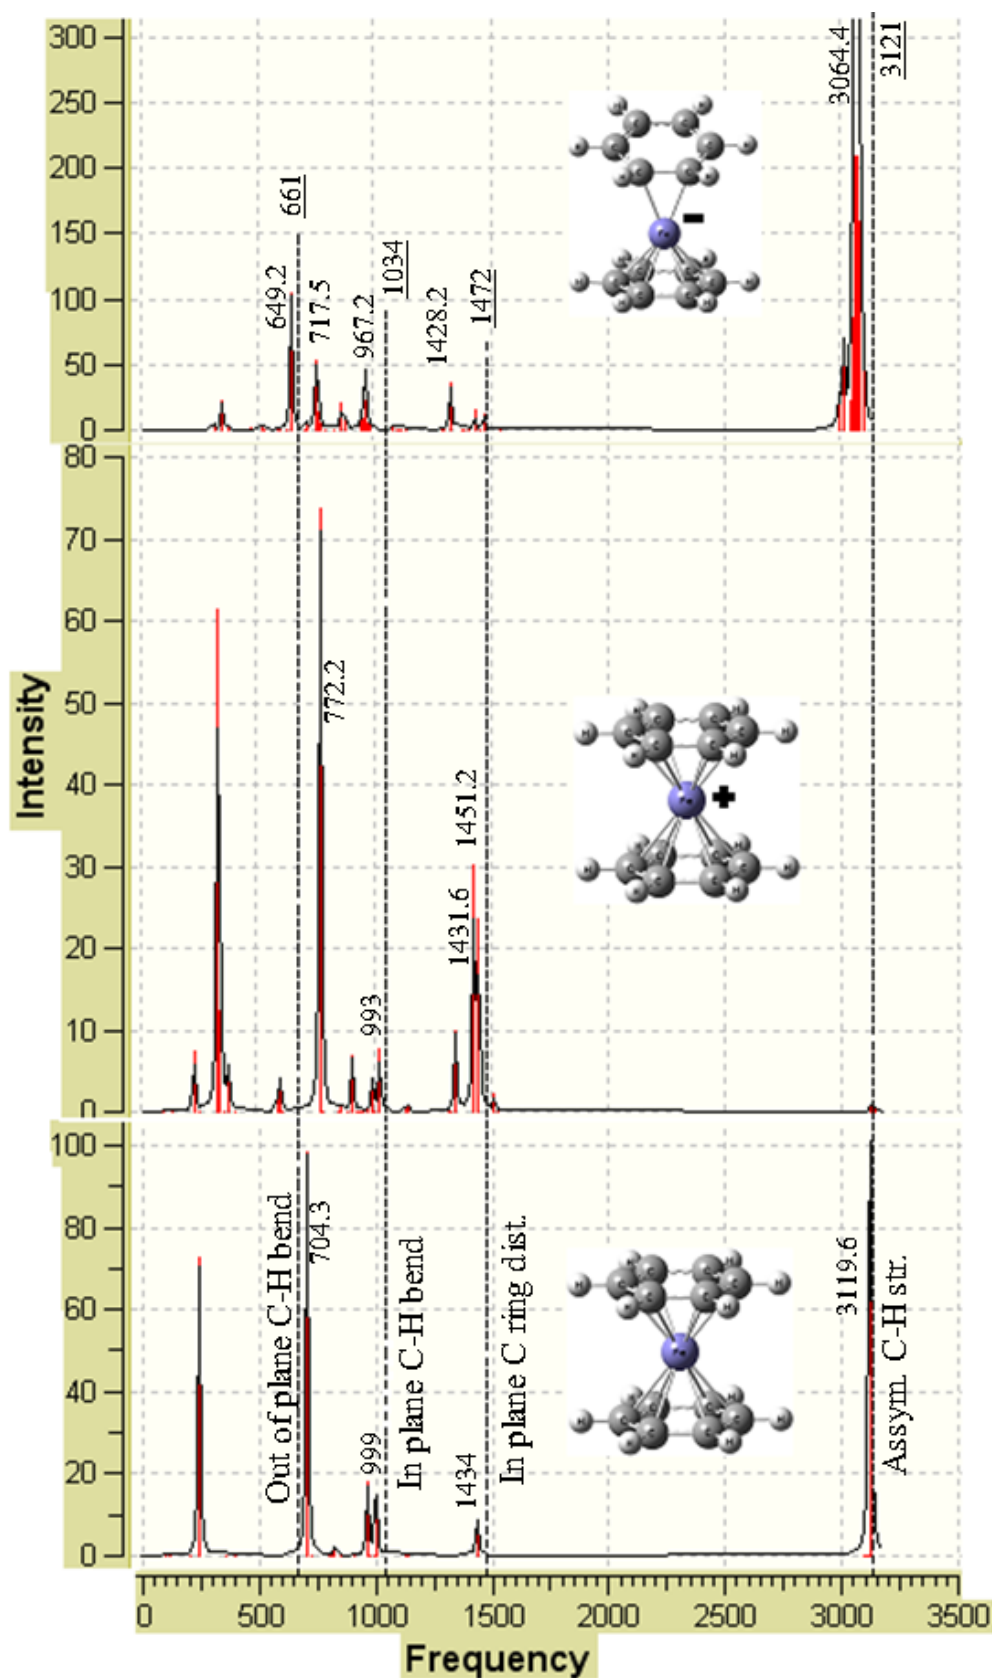

Figure S6



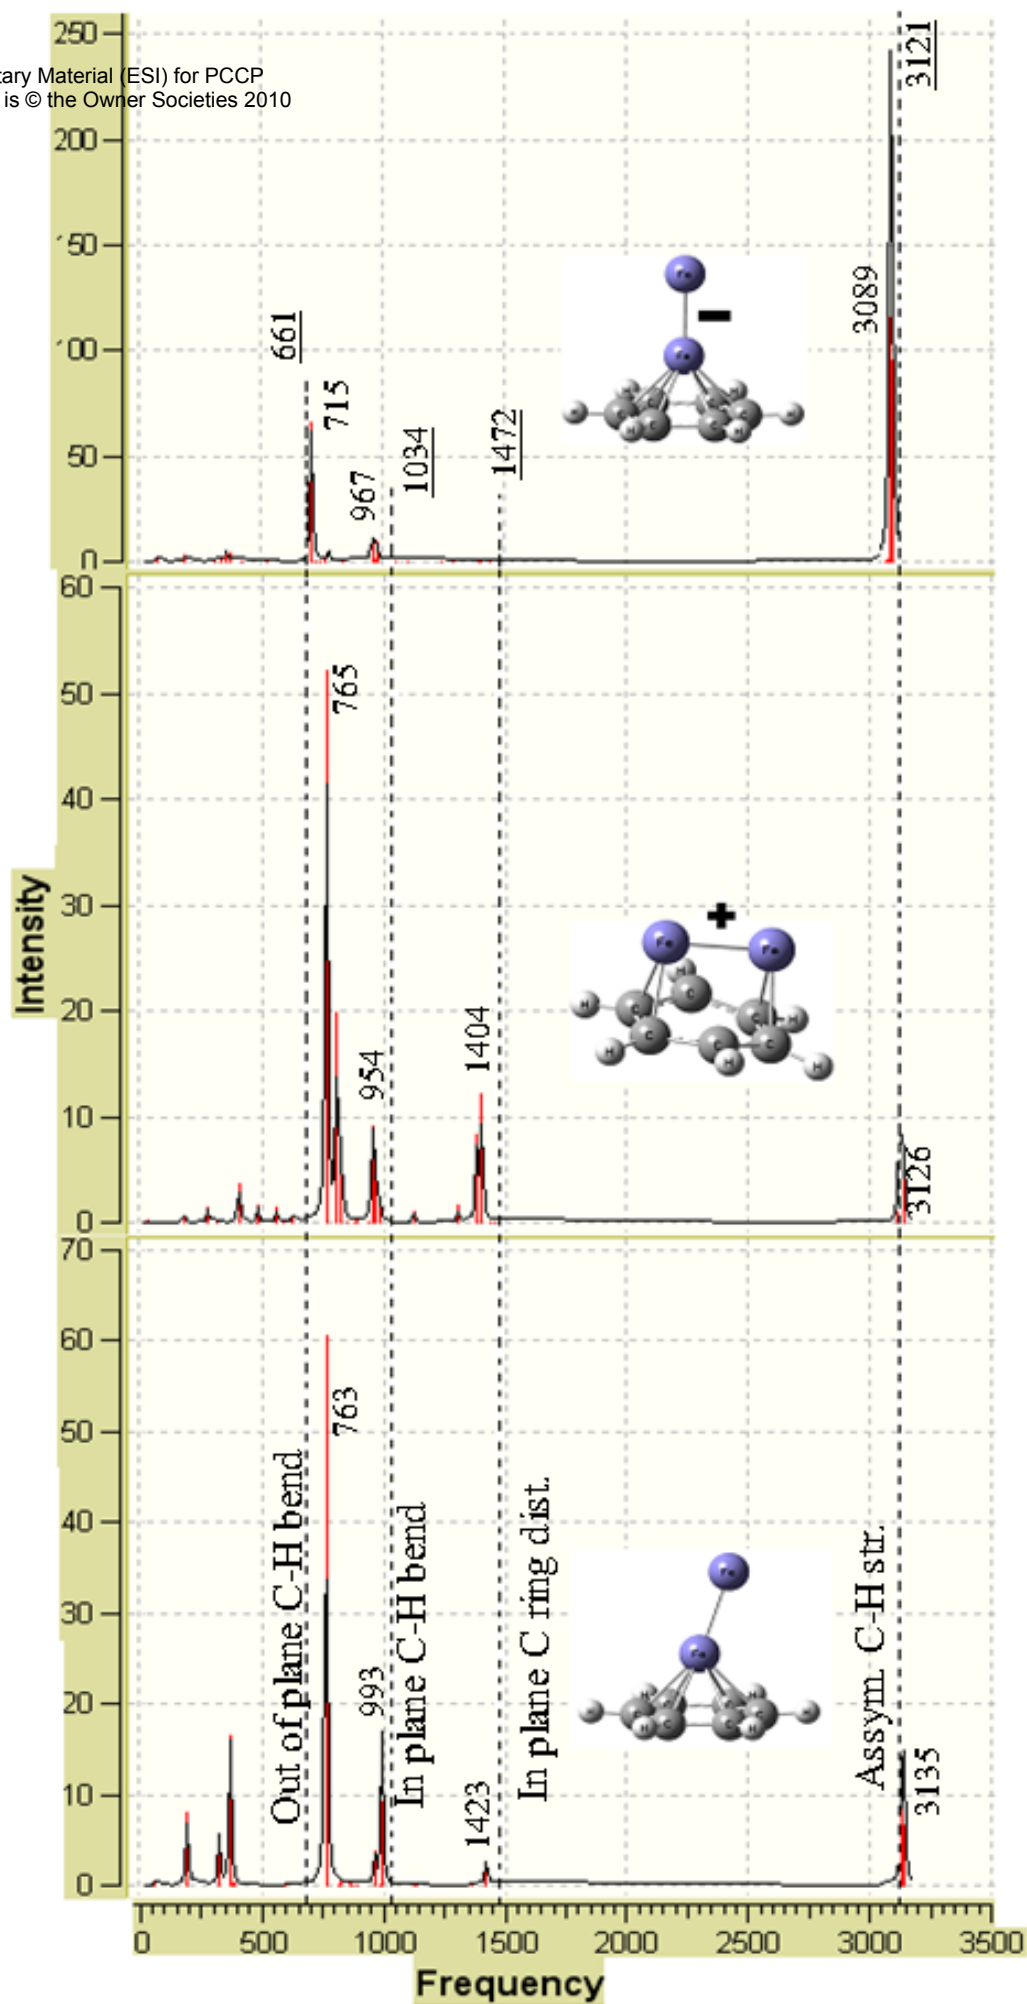

Figure S7

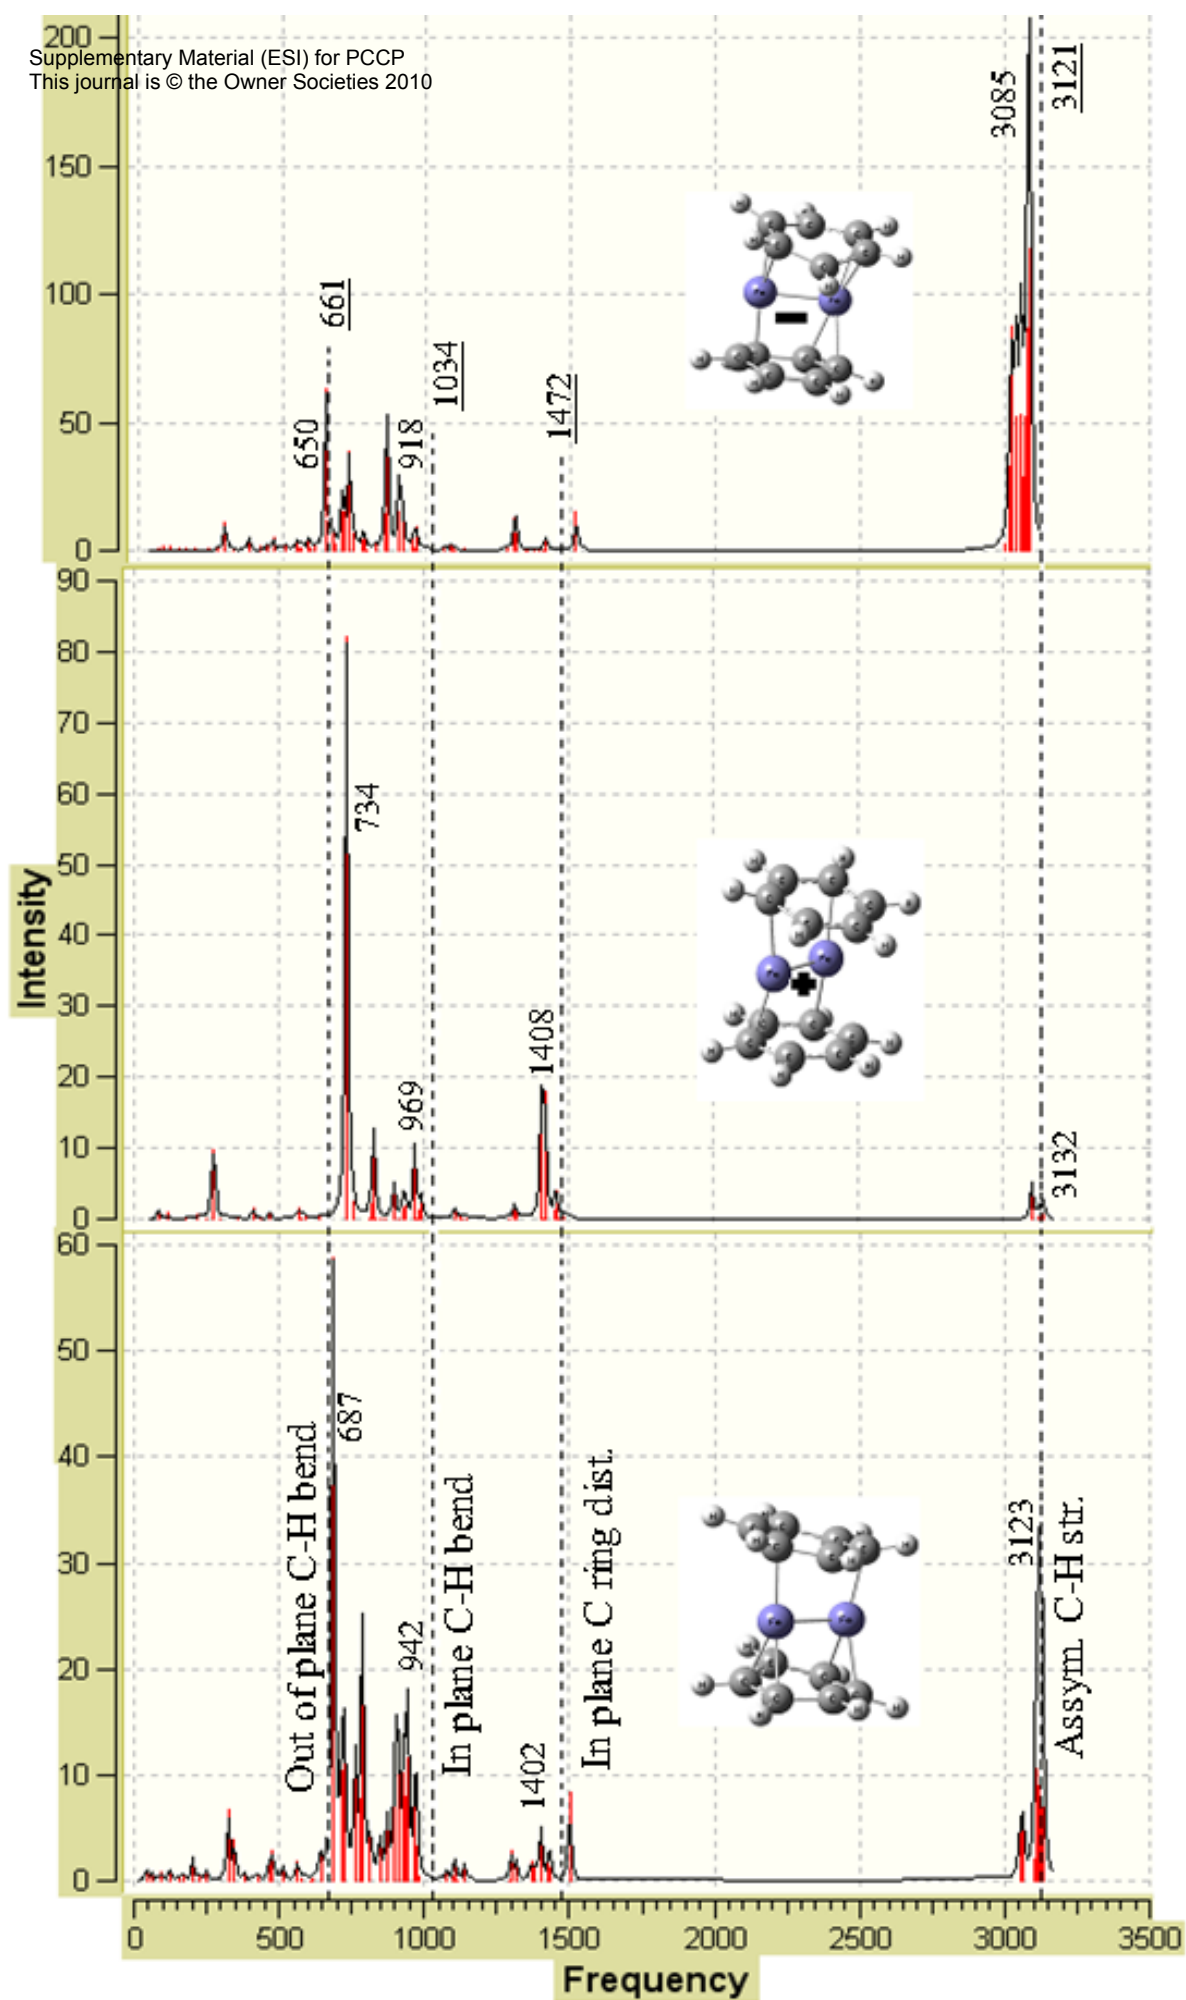

Figure S8
